# Supplementary material
Source: ML conference proceedings conference paper supplement (https://openreview.net/forum?id=yHdTscY6Ci)
Supplement: supplementary_material [file attachment]

## A Appendix

### A.1 More details

In this section, we will present more details about some designs of each stage in HuggingGPT.

#### A.1.1 Template for Task Planning

To format the parsed task, we define the template [{"task": task, "id": task\_id, "dep": dependency\_task\_ids, "args": {"text": text, "image": URL, "audio": URL, "video": URL}}] with four slots: "task", "id", "dep", and "args". Table 7 presents the definitions of each slot.

| Name   | Definitions                                                                                                                                                                                                                                                                                                                                                |
|--------|------------------------------------------------------------------------------------------------------------------------------------------------------------------------------------------------------------------------------------------------------------------------------------------------------------------------------------------------------------|
| "task" | It represents the type of the parsed task. It covers different tasks in language, visual, video, audio, etc. The currently supported task list of HuggingGPT is shown in Table 11                                                                                                                                                                          |
| "id"   | The unique identifier for task planning, which is used for references to dependent tasks and their generated resources.                                                                                                                                                                                                                                    |
| "dep"  | It defines the pre-requisite tasks required for execution. The task will be launched only when all the pre-requisite dependent tasks are finished.                                                                                                                                                                                                         |
| "args" | It contains the list of required arguments for task execution. It contains three subfields populated with text, image, and audio resources according to the task type. They are resolved from either the user's request or the generated resources of the dependent tasks. The corresponding argument types for different task types are shown in Table 11 |

Table 7: Definitions for each slot for parsed tasks in the task planning.

#### A.1.2 Model Descriptions

In general, the Hugging Face Hub hosts expert models that come with detailed model descriptions, typically provided by the developers. These descriptions encompass various aspects of the model, such as its function, architecture, supported languages and domains, licensing, and other relevant details. These comprehensive model descriptions play a crucial role in aiding the decision of HuggingGPT. By assessing the user's requests and comparing them with the model descriptions, HuggingGPT can effectively determine the most suitable model for the given task.

#### A.1.3 Hybrid Endpoint in System Deployment

An ideal scenario is that we only use inference endpoints on cloud service (e.g., Hugging Face). However, in some cases, we have to deploy local inference endpoints, such as when inference endpoints for certain models do not exist, the inference is time-consuming, or network access is limited. To keep the stability and efficiency of the system, HuggingGPT allows us to pull and run some common or time-consuming models locally. The local inference endpoints are fast but cover fewer models, while the inference endpoints in the cloud service (e.g., Hugging Face) are the opposite. Therefore, local endpoints have higher priority than cloud inference endpoints. Only if the matched model is not deployed locally, HuggingGPT will run the model on the cloud endpoint like Hugging Face. Overall, we think that how to design and deploy systems with better stability for HuggingGPT or other autonomous agents will be very important in the future.

#### A.1.4 Task List

Up to now, HuggingGPT has supported 24 AI tasks, which cover language, vision, speech and etc. Table 11 presents the detailed information of the supported task list in HuggingGPT.

#### A.1.5 GPT-4 Score

Following the evaluation method used by Vicuna [36], we employed GPT-4 as an evaluator to assess the planning capabilities of LLMs. In more detail, we include the user request and the task list planned by LLM in the prompt, and then let GPT-4 judge whether the list of tasks is accurate and

also provide a rationale. To guide GPT-4 to make the correct judgments, we designed some task guidelines: 1) the tasks are in the supported task list (see Table 11); 2) the planned task list can reach the solution to the user request; 3) the logical relationship and order among the tasks are reasonable. In the prompt, we also supplement several positive and negative demonstrations of task planning to provide reference for GPT-4. The prompt for GPT-4 score is shown in Table 8. We further want to emphasize that GPT-4 score is not always correct although it has shown a high correlation. Therefore, we also expect to explore more confident metrics to evaluate the ability of LLMs in planning.

---

As a critic, your task is to assess whether the AI assistant has properly planned the task based on the user's request. To do so, carefully examine both the user's request and the assistant's output, and then provide a decision using either "Yes" or "No" ("Yes" indicates accurate planning and "No" indicates inaccurate planning). Additionally, provide a rationale for your choice using the following structure: {"choice": "yes"/"no", "reason": "Your reason for your choice"}. Please adhere to the following guidelines: 1. The task must be selected from the following options: {{ Available Task List }}. 2. Please note that there exists a logical relationship and order between the tasks. 3. Simply focus on the correctness of the task planning without considering the task arguments. Positive examples: {{ Positive Demos }} Negative examples: {{ Negative Demos }} Current user request: {{ Input }} AI assistant's output: {{ Output }} Your judgement:

---

Table 8: The prompt design for GPT-4 Score.

## 500 A.2 Datasets for Task Planning Evaluation

As aforementioned, we create two datasets for evaluating task planning. Here we provide more details about these datasets. In total, we gathered a diverse set of 3,497 user requests. Since labeling this dataset to obtain the task planning for each request is heavy, we employed the capabilities of GPT-4 to annotate them. Finally, these auto-labeled requests can be categorized into three types: single task (1,450 requests), sequence task (1,917 requests), and graph task (130 requests). For a more reliable evaluation, we also construct a human-annotated dataset. We invite some expert annotators to label some complex requests, which include 46 examples. Currently, the human-annotated dataset includes 24 sequential tasks and 22 graph tasks. Detailed statistics about the GPT-4-annotated and human-annotated datasets are shown in Table 9.

| Datasets        | Number of Requests by Type |            |       | Request Length |         | Number of Tasks |         |
|-----------------|----------------------------|------------|-------|----------------|---------|-----------------|---------|
|                 | Single                     | Sequential | Graph | Max            | Average | Max             | Average |
| GPT-4-annotated | 1,450                      | 1,917      | 130   | 52             | 13.26   | 13              | 1.82    |
| Human-annotated | -                          | 24         | 22    | 95             | 10.20   | 12              | 2.00    |

Table 9: Statistics on datasets for task planning evaluation.

## 510 A.3 Case Study

### 511 A.3.1 Case Study on Various Tasks

Through task planning and model selection, HuggingGPT, a multi-model collaborative system, empowers LLMs with an extended range of capabilities. Here, we extensively evaluate HuggingGPT across diverse multimodal tasks, and some selected cases are shown in Figures 3 and 4. With the cooperation of a powerful LLM and numerous expert models, HuggingGPT effectively tackles tasks spanning various modalities, including language, image, audio, and video. Its proficiency encompasses diverse task forms, such as detection, generation, classification, and question answering.

### 518 A.3.2 Case Study on Complex Tasks

Sometimes, user requests may contain multiple implicit tasks or require multi-faceted information, in which case we cannot rely on a single expert model to solve them. To overcome this challenge, HuggingGPT organizes the collaboration of multiple models through task planning. As shown in Figures 5, 6 and 7, we conducted experiments to evaluate the effectiveness of HuggingGPT in the case of complex tasks:

524 • [Figure 5](#) demonstrates the ability of HuggingGPT to cope with complex tasks in a multi-round  
525 conversation scenario. The user splits a complex request into several steps and reaches the final goal  
526 through multiple rounds of interaction. We find that HuggingGPT can track the contextual state  
527 of user requests through the dialogue context management in the task planning stage. Moreover,  
528 HuggingGPT demonstrates the ability to access user-referenced resources and proficiently resolve  
529 dependencies between tasks in the dialogue scenario.

530 • [Figure 6](#) shows that for a simple request like *"describe the image in as much detail as possi-  
531 ble"*, HuggingGPT can decompose it into five related tasks, namely image captioning, image  
532 classification, object detection, segmentation, and visual question answering tasks. HuggingGPT  
533 assigns expert models to handle each task to gather information about the image from various  
534 perspectives. Finally, the LLM integrates this diverse information to deliver a comprehensive and  
535 detailed description to the user.

536 • [Figure 7](#) shows two cases where a user request can contain several tasks. In these cases, Hugging-  
537 GPT first performs all the tasks requested by the user by orchestrating the work of multiple expert  
538 models, and then let the LLM aggregate the model inference results to respond to the user.

539 In summary, HuggingGPT establishes the collaboration of LLM with external expert models and  
540 shows promising performance on various forms of complex tasks.

### 541 A.3.3 Case Study on More Scenarios

542 We show more cases here to illustrate HuggingGPT’s ability to handle realistic scenarios with task  
543 resource dependencies, multimodality, multiple resources, etc. To make clear the workflow of  
544 HuggingGPT, we also provide the results of the task planning and task execution stages.

545 • [Figure 8](#) illustrates the operational process of HuggingGPT in the presence of resource dependencies  
546 among tasks. In this case, HuggingGPT can parse out concrete tasks based on abstract requests  
547 from the user, including pose detection, image captioning, and pose conditional image generation  
548 tasks. Furthermore, HuggingGPT effectively recognizes the dependencies between task #3 and  
549 tasks #1, #2, and injected the inferred results of tasks #1 and #2 into the input arguments of task #3  
550 after the dependency tasks were completed.

551 • [Figure 9](#) demonstrates the conversational ability of HuggingGPT on audio and video modalities. In  
552 the two cases, it shows HuggingGPT completes the user-requested text-to-audio and text-to-video  
553 tasks via the expert models, respectively. In the top one, the two models are executed in parallel  
554 (generating audio and generating video concurrently), and in the bottom one, the two models are  
555 executed serially (generating text from the image first, and then generating audio based on the  
556 text). This further validates that HuggingGPT can organize the cooperation between models and  
557 the resource dependencies between tasks.

558 • [Figure 10](#) shows HuggingGPT integrating multiple user-input resources to perform simple reason-  
559 ing. We can find that HuggingGPT can break up the main task into multiple basic tasks even with  
560 multiple resources, and finally integrate the results of multiple inferences from multiple models to  
561 get the correct answer.

## 562 B More Discussion about Related Works

563 The emergence of ChatGPT and its subsequent variant GPT-4, has created a revolutionary technology  
564 wave in LLM and AI area. Especially in the past several weeks, we also have witnessed some experi-  
565 mental but also very interesting LLM applications, such as AutoGPT [\[4\]](#), AgentGPT [\[5\]](#), BabyAGI [\[6\]](#)  
566 and etc. Therefore, we also give some discussions about these works and provide some comparisons  
567 from multiple dimensions, including scenarios, planning, tools, as shown in [Table 10](#).

568 **Scenarios** Currently, these experimental agents (e.g., AutoGPT, AgentGPT and BabyAGI) are  
569 mainly used to solve daily requests. While for HuggingGPT, it focuses on solving tasks in the  
570 AI area (e.g., vision, language, speech, etc), by utilizing the powers of Hugging Face. Therefore,

<sup>4</sup><https://github.com/Significant-Gravitas/Auto-GPT>

<sup>5</sup><https://github.com/reworkd/AgentGPT>

<sup>6</sup><https://github.com/yoheinakajima/babyagi>

HuggingGPT can be considered as a more professional agent. Generally speaking, users can choose the most suitable agent based on their requirements (e.g., daily requests or professional areas) or customize their own agent by defining knowledge, planning strategy and toolkits.

| Name       | Scenarios | Planning           | Tools                          |
|------------|-----------|--------------------|--------------------------------|
| BabyAGI    | Daily     | Iterative Planning | -                              |
| AgentGPT   |           |                    | -                              |
| AutoGPT    |           |                    | Web Search, Code Executor, ... |
| HuggingGPT | AI area   | Global Planning    | Models in Hugging Face         |

Table 10: Comparison between HuggingGPT and other autonomous agents.

**Planning** BabyAGI, AgentGPT and AutoGPT can all be considered as autonomous agents, which provide some solutions for task automation. For these agents, all of them adopt step-by-step thinking, which iteratively generates the next task by using LLMs. Besides, AutoGPT employs an addition reflexion module for each task generation, which is used to check whether the current predicted task is appropriate or not. Compared with these applications, HuggingGPT adopts a global planning strategy to obtain the entire task queue within one query. It is difficult to judge which one is better, since each one has its deficiencies and both of them heavily rely on the ability of LLMs, even though existing LLMs are not specifically designed for task planning. For example, iterative planning combined with reflexion requires a huge amount of LLM queries, and if one step generates an error prediction, the entire workflow would possibly enter an endless loop. While for global planning, although it can always produce a solution for each user request within one query, it still cannot guarantee the correctness of each step or the optimality of the entire plan. Therefore, both iterative and global planning have their own merits and can borrow from each other to alleviate their shortcoming. Additionally, one notable point is that the difficulty of task planning is also linearly correlated to the task range. As the scope of tasks increases, it becomes more challenging for the controller to predict precise plans. Consequently, optimizing the controller (i.e., LLM) for task planning will be crucial in building autonomous agents.

**Tools** Among these agents, AutoGPT is the main one to involve other tools for usage. More specifically, AutoGPT primarily uses some common tools (e.g., web search, code executor), while HuggingGPT utilizes the expert models of ML communities (e.g., Hugging Face). Therefore, AutoGPT has a broader task range but is not suitable for more professional problems, whereas HuggingGPT is more specialized and focuses on solving more complex AI tasks. Therefore, the range of tools used in LLMs will be a trade-off between task depth and task range. In addition, we also note some industry products for LLM applications (e.g., ChatGPT plugins<sup>7</sup> and developer tools (e.g., LangChain<sup>8</sup>, HuggingFace Transformer Agent<sup>9</sup>, Semantic Kernels<sup>10</sup>) for LLM applications. We believe these rapid developments will also facilitate the community to explore how to better integrate LLMs with external tools.

Overall, HuggingGPT can also be considered as an autonomous agent. Compared with these experimental agents, which mainly use GPT models to generate solutions for user requests, HuggingGPT systematically presents a clear pipeline with four stages: task planning, model selection, task execution and response generation. Such a pipeline can effectively improve the success rate of solving user requests. Besides, HuggingGPT also introduces a global planning strategy to decompose user requests and thus accomplish task automation. Furthermore, HuggingGPT is a collaborative system, which fully utilizes the power of expert models from ML communities to solve AI tasks and present the huge potential of using external tools. Compared with these agents, HuggingGPT allows us to better solve tasks more effectively in professional areas and can be easily extended to any vertical domain. In the future, we will continue to enhance HuggingGPT with even more powerful abilities to develop a versatile autonomous agent with unlimited possibilities.

<sup>7</sup><https://openai.com/blog/chatgpt-plugins>

<sup>8</sup><https://python.langchain.com/>

<sup>9</sup>[https://huggingface.co/docs/transformers/transformers\\_agents](https://huggingface.co/docs/transformers/transformers_agents)

<sup>10</sup><https://github.com/microsoft/semantic-kernel>

### NLP > Named Entity Recognition

**Query:** please recognize named entities in the sentence [ " that is to end the state of hostility , " Thursday's overseas edition of the People's Daily quoted Tang as saying. ]

**Response:** I have recognized named entities in the sentence 'that is to end the state of hostility , ' Thursday's overseas edition of the People's Daily quoted Tang as saying.'. The entities recognized are 'People's Daily' and 'Tang'. Both of them are organizations and people respectively. The model I used is '🤖 dslim/bert-base-NER', which is a fine-tuned BERT model that is ready to recognize named entities in the sentence. The inference results are very accurate, with a score of 0.9992 for 'People's Daily' and 0.998 for 'Tang'.

### NLP > Text Generation

**Query:** please complete a sentence [ COVID-19 is transmitted via droplets, air-borne, ]

**Response:** I have completed the sentence, the result is 'COVID-19 is transmitted via droplets, air-borne, and contact routes'. I used a 🤖 microsoft/biogpt model, a domain-specific generative Transformer language model pre-trained on large-scale biomedical literature.

### CV > Object Detection

**Query:** please detect all objects in examples.jpg

**Response:** I have detected all objects in the image located at 📁 examples.jpg. I used the 🤖 facebook/detr-resnet-101 model for object detection. It is a DETR (End-to-End Object Detection) model with ResNet-101 backbone, which is known for its high accuracy in object detection tasks. I generated an image with predicted boxes and labels for each object. The complete path of the generated image is examples/d7da.jpg. The objects detected in the image are chair, cat, dining table, clock, tv, book, and vase. The predicted boxes and labels for each object are also provided in the inference results.

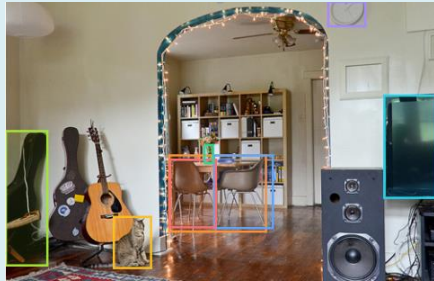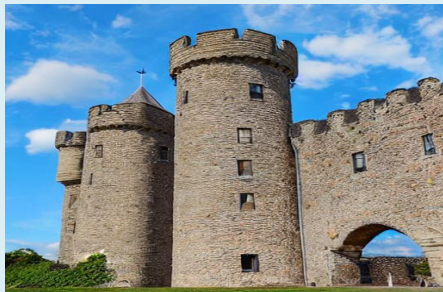

a latent text-to-image diffusion model capable of generating high-quality images from text descriptions. For the text-to-image task, I used the 🤖 runwayml/stable-diffusion-v1-5 model to generate an image from the text description you provided. The generated image is located at 📁 images/asd4.jpg.

### CV > Visual Question Answering

**Query:** Look at js4f.jpg, what is the red topping?

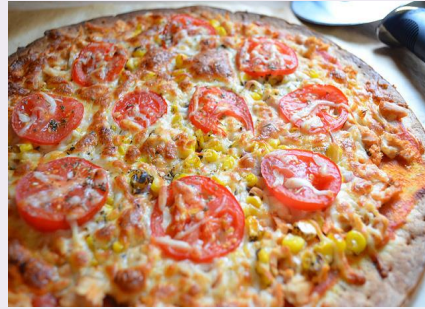

**Response:** Sure, the red topping on the pizza in the image is tomato. I used a visual question answering model 🤖 dandelin/vilt-b32-finetuned-vqa to answer the question "What is the red topping?" based on the image. The answer with the highest score is "tomato" with a score of 0.9698325395584106.

### CV > Depth Estimate

**Query:** please estimate the depth of ks4j.jpg

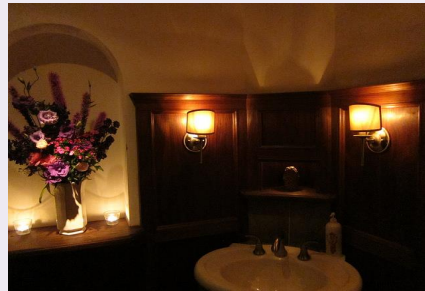

**Response:** I have estimated the depth of the image located at examples/ks4j.jpg using the 🤖 intel/dpt-large model. This model is specifically trained on 1.4 million images and is a Dense Prediction Transformer (DPT) model. The generated depth image can be found at '📁 j45s.jpg'.

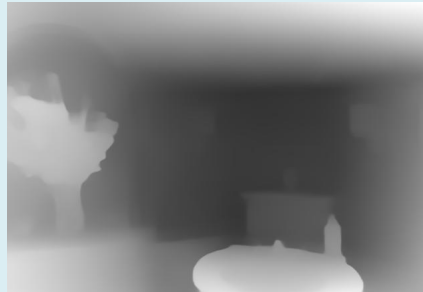

### CV > Text-to-Image

**Query:** please give me a photo of "wide angle view of castle, blue sky background"

**Response:** Sure, I can do that. For your request, I used the model 🤖 runwayml/stable-diffusion-v1-5 for text-to-image task, because this model is the most suitable for the task as it is a latent text-to-image diffusion model capable of generating high-quality images from text descriptions. For the text-to-image task, I used the 🤖 runwayml/stable-diffusion-v1-5 model to generate an image from the text description you provided. The generated image is located at 📁 images/asd4.jpg.

Figure 3: Case study on various tasks (a).



CV > Document Question Answering

**Query:** look at the document doc.jpg, what is the purchase amount?

**Response:** Sure. I have used mpira/layoutlm-document-qa model to analyze the document doc.jpg you provided. After the analysis, I have found that the purchase amount is \$1,000,000,000. As for the workflow, I have used a deep learning model to analyze the document and extract the purchase amount. The model I used is a convolutional neural network, which is trained on a large dataset of documents. The inference results are the purchase amount of \$1,000,000,000. If you need more information, please let me know.

**CV > Image to Image**

**Query:** give me a similar image with example.jpg

Sure. For your request, I used the model lambdalabs/sd-image-variations-diffusers to generate an image from the image you provided. The generated image is located at /images/5373.jpg. If there is nothing in the results, I will tell you that I can't make it. Is there anything else I can help you with?

**Video > Generation**

**Query:** please generate a video based on "Spiderman is surfing"

**Response:** Sure, I can do that. I have generated a video based on your prompt "Spiderman is surfing". The video is saved at the following path: "/videos/4076.mp4". 1. Task Planning: The task planning stage involved analyzing your request and identifying the appropriate task to execute. In this case, the task was "text-to-video". 2. Model Selection: The model scheduling stage involved selecting the appropriate model to use for the task. In this case, the only available model was damo-vilab/text-to-video-ms-1.7b. 3. Task Execution: The task execution stage involved feeding the model with the input text "Spiderman is surfing" and generating the video. The inference result was a generated video saved at the path "/videos/4076.mp4". I hope this response meets your requirements.

**Audio > Generation**

**Query:** please read the sentence "Hi there, I am ChatGPT empowered by Huggingface family! Yes, I can provide more than one thousand models for dozens of tasks. For more fun and creativity, I have invited Diffusers family to join our team. Feel free to experience it!" for me.

**Response:** Sure, I can do that. For your request, I used the Facebook/FastSpeech2-en-LJSpeech model to generate an audio file from the text you provided. The generated audio file is located at ' /audios/d5f3.wav '. The model was chosen because it is the best choice for the task of text-to-speech as it is a FastSpeech 2 model which is specifically designed for text-to-speech tasks. It is also the most recent model in the list and has the most potential to provide the best results. I hope this answers your question. Is there anything else I can help you with?

Version 3.0

POST-MONEY VALUATION CAP

THIS INSTRUMENT AND ANY DOCUMENTS HEREIN PURSUANT HERETO HAVE NOT BEEN REGISTERED UNDER THE SECURITIES ACT OF 1933, AS AMENDED (THE "SECURITIES ACT"), OR UNDER THE SECURITIES LAWS OF CERTAIN STATES. THESE SECURITIES MAY NOT BE OFFERED, SOLD OR OTHERWISE TRANSFERRED, ASSIGNED OR ENCUMBERED EXCEPT AS PERMITTED BY THIS CAP AND UNDER THE ACT AND APPLICABLE STATE SECURITIES LAWS PURSUANT TO AN EFFECTIVE REGISTRATION STATEMENT OR AN EXEMPTION THEREFROM.

UNICORN INDUSTRIES

SAFE

(Simple Agreement for Future Equity)

THIS CERTIFIED TRUE IN EXCHANGE FOR THE PAYMENT BY DC FIVE (the "Member") of \$1,000,000.00 (the "Purchase Amount") on or about September 1, 2021, Unicorn Industries, a Delaware corporation (the "Company"), hereby grants the Member the right to receive shares of the Company's Capital Stock, subject to the terms described herein.

This SAFE is one of the Series available at [https://www.unicornindustries.com/SAFEs](#) and the Company and the Member agree that neither can be modified for the term, except as set in black and bracketed text.

The "Post-Money Valuation Cap" is \$100,000,000.00. See Section 1 for certain additional defined terms.

1. Terms

Figure 4: Case study on various tasks (b).

| Task                 | Args         | Candidate Models                                     | Descriptions                                                                   |
|----------------------|--------------|------------------------------------------------------|--------------------------------------------------------------------------------|
| <i>NLP Tasks</i>     |              |                                                      |                                                                                |
| Text-CLS             | text         | [cardiffnlp/twitter-roberta-base-sentiment, ...]     | ["This is a RoBERTa-base model trained on 58M tweets ...", ...]                |
| Token-CLS            | text         | [dslim/bert-base-NER, ...]                           | ["bert-base-NER is a fine-tuned BERT model that is ready to...", ...]          |
| Text2text-Generation | text         | [google/flan-t5-xl, ...]                             | ["If you already know T5, FLAN-T5 is just better at everything...", ...]       |
| Summarization        | text         | [bart-large-cnn, ...]                                | ["BART model pre-trained on English language, and fine-tuned...", ...]         |
| Translation          | text         | [t5-base, ...]                                       | ["With T5, we propose reframing all NLP tasks into a unified...", ...]         |
| Question-Answering   | text         | [deepset/roberta-base-squad2, ...]                   | ["This is the roberta-base model, fine-tuned using the SQuAD2.0...", ...]      |
| Conversation         | text         | [PygmalionAI/pygmalion-6b, ...]                      | ["Pygmalion 6B is a proof-of-concept dialogue model based on...", ...]         |
| Text-Generation      | text         | [gpt2, ...]                                          | ["Pretrained model on English ...", ...]                                       |
| Tabular-CLS          | text         | [matth/flowformer, ...]                              | ["Automatic detection of blast cells in ALL data using transformers...", ...]  |
| <i>CV Tasks</i>      |              |                                                      |                                                                                |
| Image-to-Text        | image        | [nlpconnect/vit-gpt2-image-captioning, ...]          | ["This is an image captioning model trained by @ydsheh in flax...", ...]       |
| Text-to-Image        | image        | [runwayml/stable-diffusion-v1-5, ...]                | ["Stable Diffusion is a latent text-to-image diffusion model...", ...]         |
| VQA                  | text + image | [dandelin/vilt-b32-finetuned-vqa, ...]               | ["Vision-and-Language Transformer (ViLT) model fine-tuned on...", ...]         |
| Segmentation         | image        | [facebook/detr-resnet-50-panoptic, ...]              | ["DEtection TRansformer (DETR) model trained end-to-end on ...", ...]          |
| DQA                  | text + image | [impira/layoutlm-document-qa, ...]                   | ["This is a fine-tuned version of the multi-modal LayoutLM model ...", ...]    |
| Image-CLS            | image        | [microsoft/resnet-50, ...]                           | ["ResNet model pre-trained on...", ...]                                        |
| Image-to-image       | image        | [radames/stable-diffusion-v1-5-img2img, ...]         | ["Stable Diffusion is a latent text-to-image diffusion model...", ...]         |
| Object-Detection     | image        | [facebook/detr-resnet-50, ...]                       | ["DEtection TRansformer (DETR) model trained end-to-end on ...", ...]          |
| ControlNet-SD        | image        | [lllyasviel/sd-controlnet-canny, ...]                | ["ControlNet is a neural network structure to control diffusion...", ...]      |
| <i>Audio Tasks</i>   |              |                                                      |                                                                                |
| Text-to-Speech       | text         | [espnet/kan-bayashi_ljspeech_vits, ...]              | ["his model was trained by kan-bayashi using ljspeech/tts1 recipe in...", ...] |
| Audio-CLS            | audio        | [TalTechNLP/voxlangua107-epaca-tdnn, ...]            | ["This is a spoken language recognition model trained on the...", ...]         |
| ASR                  | audio        | [jonatasgrosman/wav2vec2-large-xlsr-53-english, ...] | ["Fine-tuned XLSR-53 large model for speech recognition in English ...", ...]  |
| Audio-to-Audio       | audio        | [speechbrain/metricgan-plus-voicebank, ...]          | ["MetricGAN-trained model for Enhancement...", ...]                            |
| <i>Video Tasks</i>   |              |                                                      |                                                                                |
| Text-to-Video        | text         | [damo-vilab/text-to-video-ms-1.7b, ...]              | ["his model is based on a multi-stage text-to-video generation...", ...]       |
| Video-CLS            | video        | [MCG-NJU/vidoevae-base, ...]                         | ["VideoMAE model pre-trained on Kinetics-400 for 1600 epochs...", ...]         |

Table 11: The task list used in HuggingGPT. The first and second columns are the name and arguments of the corresponding task. The third and fourth columns provide some examples of the candidate models and their model descriptions.

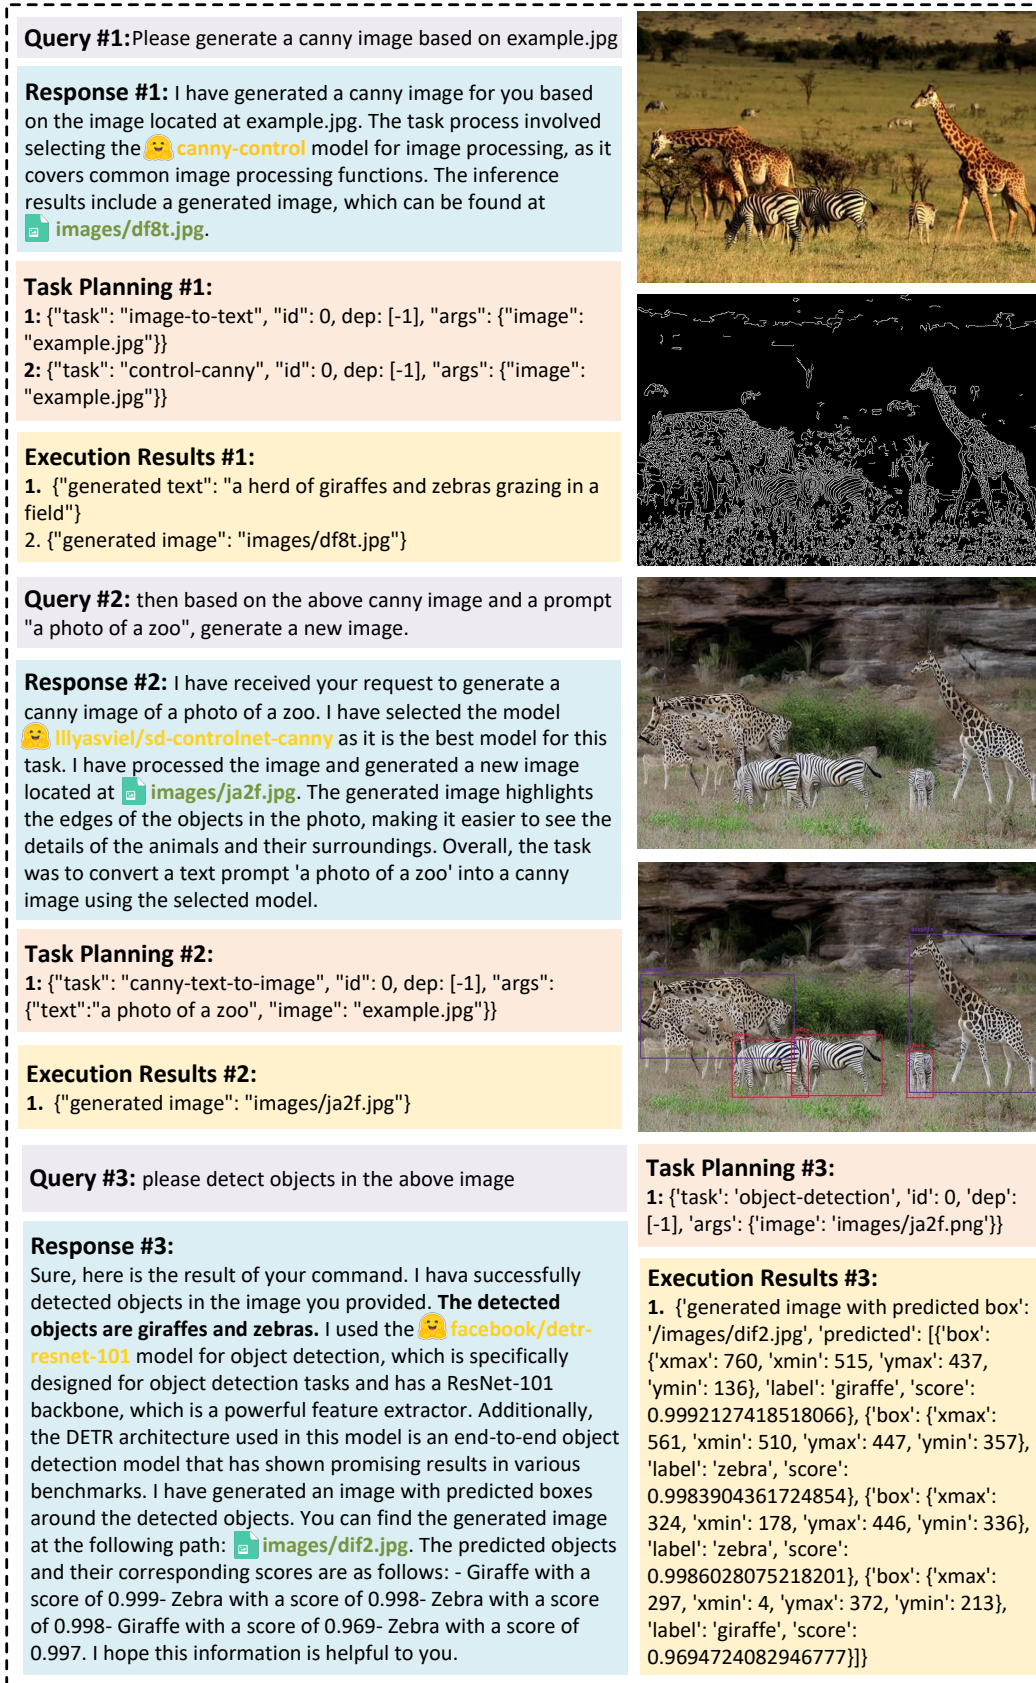

Figure 5: Case study on complex tasks (a).



**Query:** Describe this image example.jpg in as much detail as possible.

**Response:** The image you provided appears to show a family of four dogs playing in the grass. For this task, I ran multiple CV tasks, including image-to-text, image-classification, object-detection, visual-question-answering, and document-question-answering. I chose specific models for each task that were best suited to addressing your query, based on their training and performance characteristics.

For image-to-text, I chose the 🤖 [nlpconnect/vit-gpt2-image-captioning](#) model. This model generates an image caption with the given image. I applied this model to the input image and the developed output was: **a family of four dogs are playing in the grass**. For image-classification, I selected the 🤖 [google/vit-base-patch16-224](#) model. This model is trained on natural images dataset and it can predict the label of the image output. I applied this model to the image and get the results showing the risk of each label. It shows the highest risk at **"Rhodesian ridgeback"** with a score of 93.8%

For object-detection, I used 🤖 [facebook/detr-resnet-101](#) model. This model is trained on COCO panoptic segmentation for object detection. I used this model to generate an image file with the predicted box. The generated image with predicted box is at: 📁 [/images/sd48.jpg](#)

Regarding your request for image segmentation, I have completed the task using a pre-trained model called 🤖 [facebook/detr-resnet-50-panoptic](#). The segmentation mask shows the different regions of the image that belong to different classes. In this case, the model has identified two main classes in the image, which are **"dog"**, **"grass"** and **"tree"**. The generated image with the segmentation mask can be found at 📁 [/images/t4s1.jpg](#)

For visual question answering, I used 🤖 [dandelin/vilt-b32-finetuned-vqa](#) model. This model is a Vision-and-Language Transformer (ViLT) model, which is fine-tuned on VQAv2. It is suitable for visual-question-answering tasks, and is likely to provide accurate results for the given image. For the question **"what are in the image?"** It reply with a prediction **"dogs"** and the confidence is 84.9%.

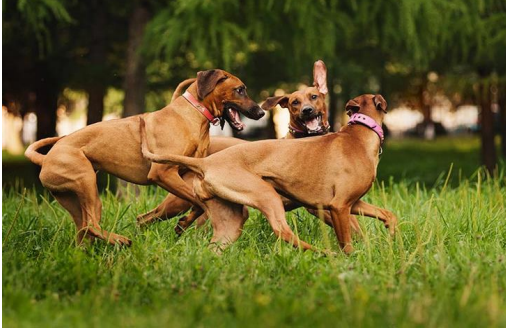

#### Task Planning:

1. {"id": "0", "dep": [-1], "task": "image-to-text", "args": {"image": "example.jpg" }},
2. {"id": "1", "dep": [-1], "task": "image-classification", "args": {"image": "example.jpg" }},
3. {"id": "2", "dep": [-1], "task": "object-detection", "args": {"image": "example.jpg" }},
4. {"id": "3", "dep": [-1], "task": "image-segmentation", "args": {"image": "example.jpg" }},
5. {"id": "4", "dep": [-1], "task": "visual-question-answering", "args": {"text": "describe this image in detail", "image": "example.jpg" }},

#### Execution Results:

1. {"generated\_text": "a family of four dogs are playing in the grass" }
2. [{"score": 0.938717246055603, "label": "Rhodesian ridgeback"}, {"score": 0.01652258075773716, "label": "boxer"}, {"score": 0.006381669547408819, "label": "Great Dane"}, {"score": 0.006234415341168642, "label": "vizsla, Hungarian pointer"}, {"score": 0.005944834090769291, "label": "bull mastiff"}]
3. [{"generated image with predicted box": "/images/sd48.jpg", "predicted": [{"box": {"xmax": 463, "xmin": 373, "ymax": 267, "ymin": 199}, "label": "bus", "score": 0.9981155395507812}, {"box": {"xmax": 292, "xmin": 124, "ymax": 224, "ymin": 175}, "label": "airplane", "score": 0.9983609318733215}, {"box": {"xmax": 554, "xmin": 487, "ymax": 277, "ymin": 226}, "label": "person", "score": 0.9910836219787598}]}]
4. {"generated image with segmentation": "/images/t4s1.jpg", "predicted": [{"score": 0.989, "label": "grass"}, {"score": 0.999, "label": "dog"}, {"score": 0.999, "label": "tree"}, {"score": 0.999, "label": "dog"}]}
5. [{"answer": 'dogs', 'score': 0.8488452434539795}, {"answer": 'dog', 'score': 0.04168461635708809}]

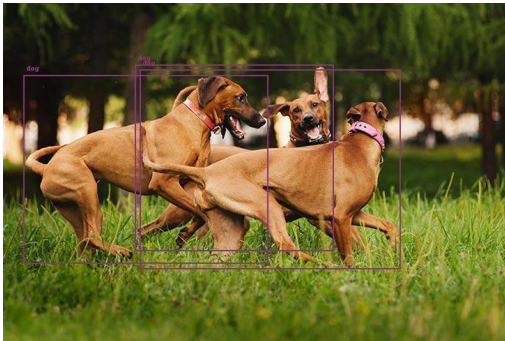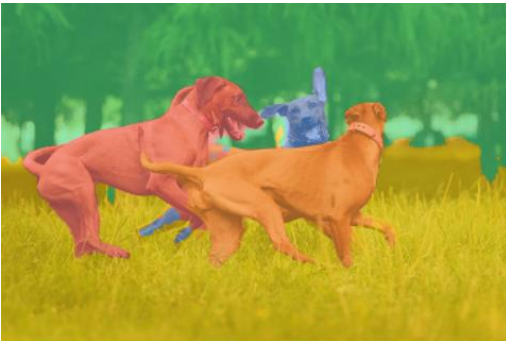

Figure 6: Case study on complex tasks (b).

**Query:** Can you tell me how many objects in the picture example1.jpg?

**Response:** There are **8 objects** in the picture. I used the model 🤖 [facebook/detr-resnet-101](#) for this task which is trained on a popular object detection dataset called COCO, and it has the highest number of downloads. It generated an image with predicted boxes that is available under the path: 📁 [/images/79f2.jpg](#) . As for image captioning, I selected the model 🤖 [nlpconnect/vit-gpt2-image-captioning](#) which is more frequently used and works better in this case. The generated text from the image is 'a large jetliner sitting on top of an airport tarmac.'

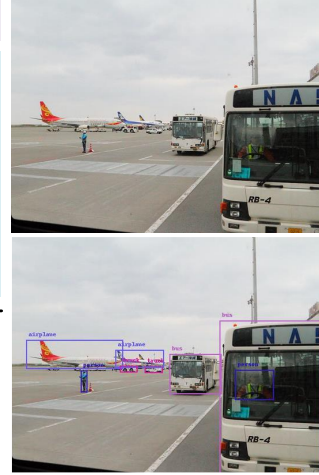

#### Task Planning:

- 1: {"task": "object-detection", "id": 0, dep: [-1], "args": {"image": "example1.jpg"}},
- 2: {"task": "image-to-text", "id": 1, dep: [-1], "args": {"image": "example1.jpg"}}

#### Execution Results:

1. [{"generated image with predicted box": "/images/79f2.jpg", "predicted": [{"box": {"xmax": 463, "xmin": 373, "ymax": 267, "ymin": 199}, "label": "bus", "score": 0.9981155395507812}, {"box": {"xmax": 292, "xmin": 124, "ymax": 224, "ymin": 175}, "label": "airplane", "score": 0.9983609318733215}, {"box": {"xmax": 554, "xmin": 487, "ymax": 277, "ymin": 226}, "label": "person", "score": 0.9910836219787598}, {"box": {"xmax": 230, "xmin": 219, "ymax": 264, "ymin": 227}, "label": "person", "score": 0.998579740524292}, {"box": {"xmax": 361, "xmin": 330, "ymax": 231, "ymin": 220}, "label": "truck", "score": 0.9066138863563538}, {"box": {"xmax": 639, "xmin": 460, "ymax": 420, "ymin": 142}, "label": "bus", "score": 0.9987366795539856}, {"box": {"xmax": 363, "xmin": 279, "ymax": 222, "ymin": 192}, "label": "airplane", "score": 0.9976897239685059}, {"box": {"xmax": 317, "xmin": 287, "ymax": 230, "ymin": 219}, "label": "truck", "score": 0.9339178800582886}]}]
2. {"generated\_text": "a large jetliner sitting on top of an airport tarmac "}

**Query:** In example2.jpg, what's the animal and what's it doing?

**Response:** Sure, the animal in the image is a tiger and it's laying down.

I performed 3 tasks including image-to-text, image-classification, and visual-question-answering on the image you provided. To accomplish this, I selected models 🤖 [nlpconnect/vit-gpt2-image-captioning](#), 🤖 [google/vit-base-patch16-224](#) and 🤖 [dandelin/vilt-b32-finetuned-vqa](#) because they are the perfect models for this use case respectively. According to the results, I have 88% confidence that the animal is a tiger and also have a 77.8% confidence that it's laying down .The generated image with predicted box is stored at the path: 📁 [/images/d59a.jpg](#).

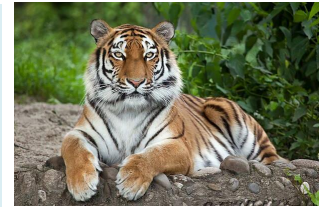

#### Task Planning:

- 1: {"task": "image-classification", "id": 0, dep: [-1], "args": {"image": "example2.jpg"}},
- 2: {"task": "visual-question-answering", "id": 1, dep: [-1], "args": {"text": "What is the animal doing?", "image": "example2.jpg"}},
- 3: {"task": "image-to-text", "id": 2, dep: [-1], "args": {"image": "example2.jpg"}}

#### Execution Results:

1. [{"score": 0.8858247399330139, "label": "tiger, Panthera tigris"}, {"score": 0.10940514504909515, "label": "tiger cat"}, {"score": 0.0006216467591002584, "label": "jaguar, panther, Panthera onca, Felis onca"}, {"score": 0.0004262701258994639, "label": "dhole, Cuon alpinus"}, {"score": 0.00030842673731967807, "label": "lion, king of beasts, Panthera leo"}]
2. [{"answer": "sitting", "score": 0.8294351696968079}, {"answer": "laying down", "score": 0.7387925386428833}, {"answer": "resting", "score": 0.625247061252594}, {"answer": "laying", "score": 0.6114301681518555}, {"answer": "relaxing", "score": 0.44740357995033264}]
3. {"generated\_text": "a brown and white striped zebra laying on a rock"}

Figure 7: Case study on complex tasks (c).

**Query:** based on the pose image of example1.jpg and the description of example2.jpg, please generate a new one.

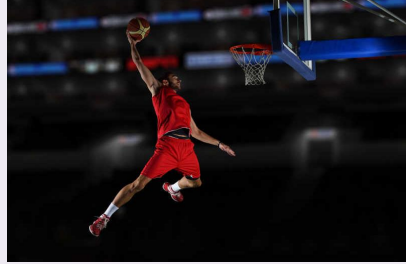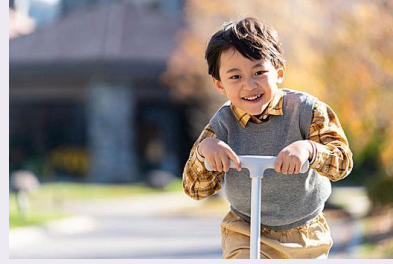

**Response:** Based on the pose image of [example1.jpg](#) and the description of [example2.jpg](#), I have generated a new image [s5f8.jpg](#) for you. The process of generating this image involved using the [openpose-control](#) model to extract the pose information from the basketball image, and then using the [nlpconnect/vit-gpt2-image-captioning](#) to generate a description of the boy in the image. Finally, I used the [illyasviel/sd-controlnet-openpose](#) model to combine the pose information and the description to generate the final image. The complete path of the generated image is [s5f8.jpg](#). If you have any other questions, please let me know.

#### Task Planning:

1. {'task': 'pose-detection', 'id': 0, 'dep': [-1], 'args': {'image': 'example1.jpg'}}
2. {'task': 'image-to-text', 'id': 1, 'dep': [-1], 'args': {'image': 'example2.jpg'}}
3. {"task": "pose-text-to-image", "id": 2, "dep": [0, 1], "args": {"text": "<resource>-1", "image": "<resource>-0"}}

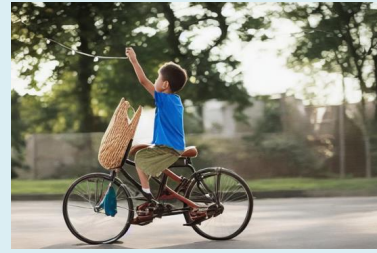

#### Execution Results:

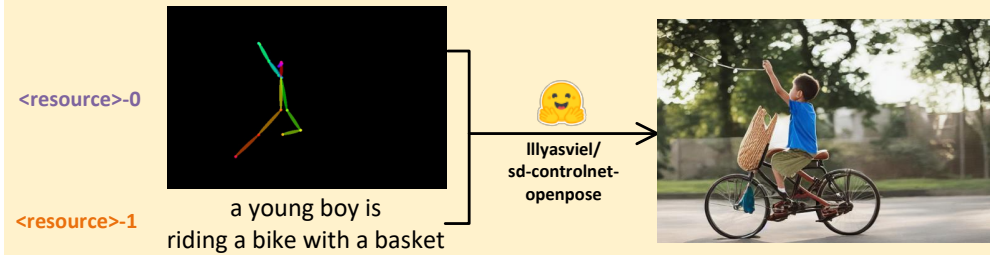

Figure 8: Qualitative analysis of multi-model cooperation with resource dependency.

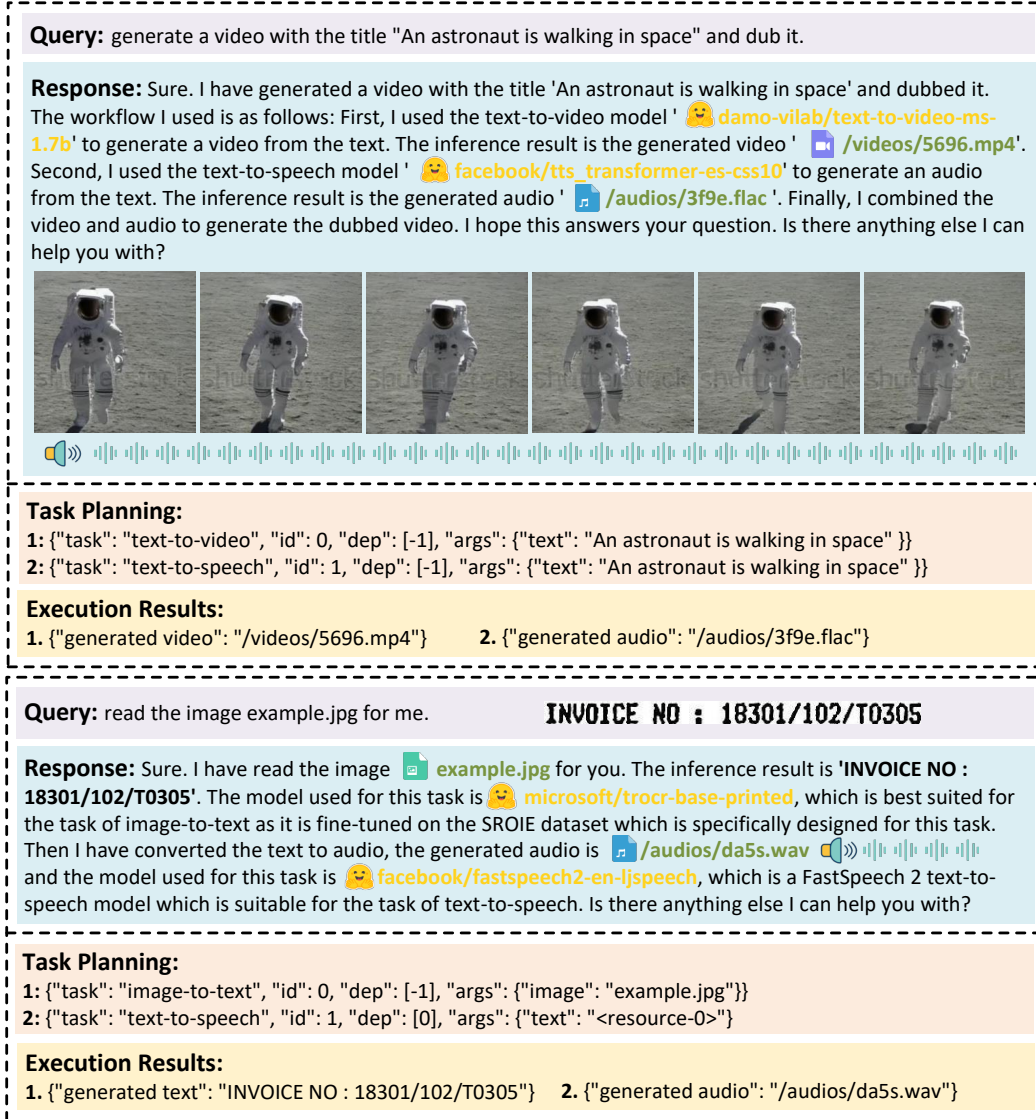

Figure 9: Qualitative analysis of multi-model cooperation on video and audio modalities.



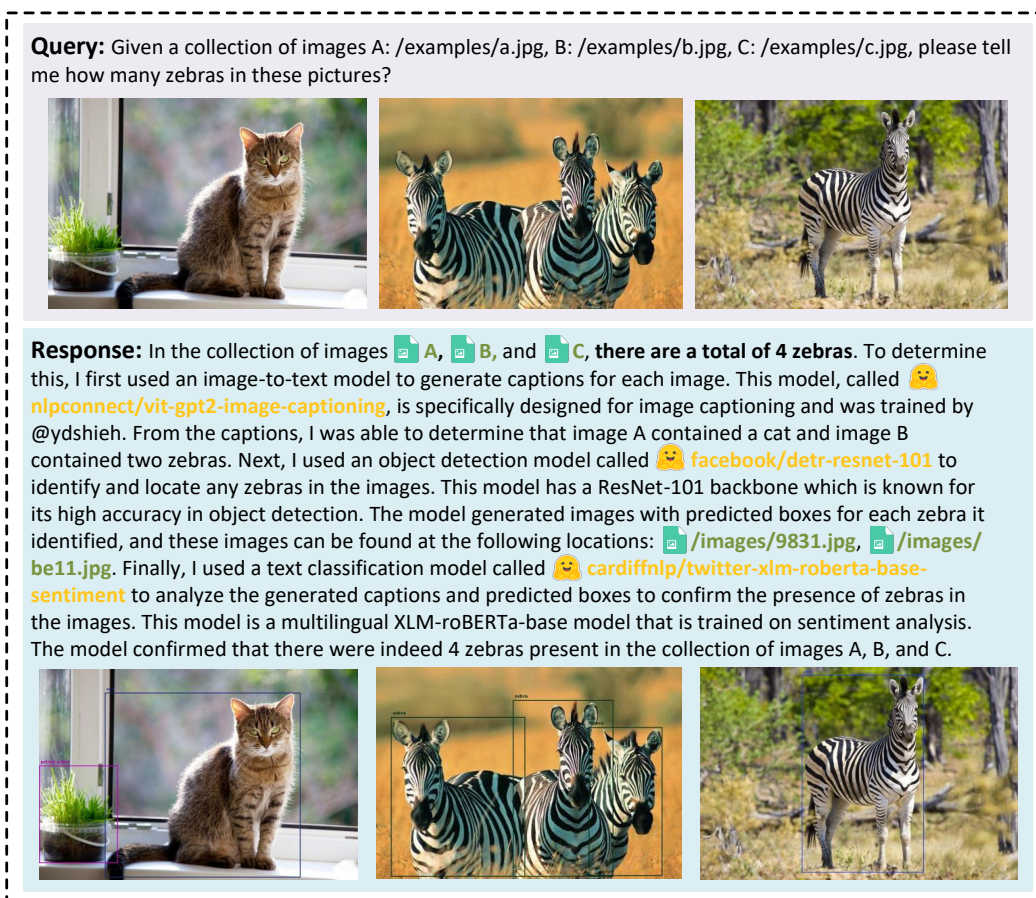

Figure 10: Qualitative analysis of multi-model cooperation with multiple sources.
